# Supplementary material
Source: PubMed Central journal article supplement (PMC5748015)
Supplement: NIHMS916021-supplement-Supplemental_Figure_1.pdf [file NIHMS916021-supplement-Supplemental_Figure_1.pdf]

**Figure 1.** Statistical models supporting the mediating role of social functioning to explain the effects of diarrhea on depression and anxiety.

Figure 1a.

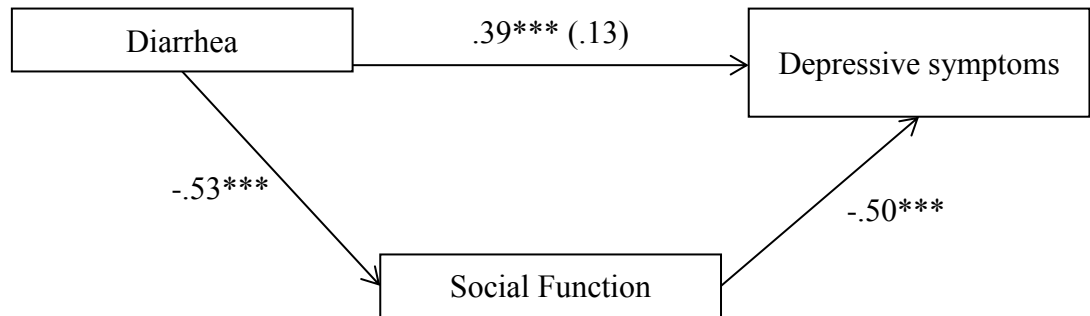

Figure 1b.

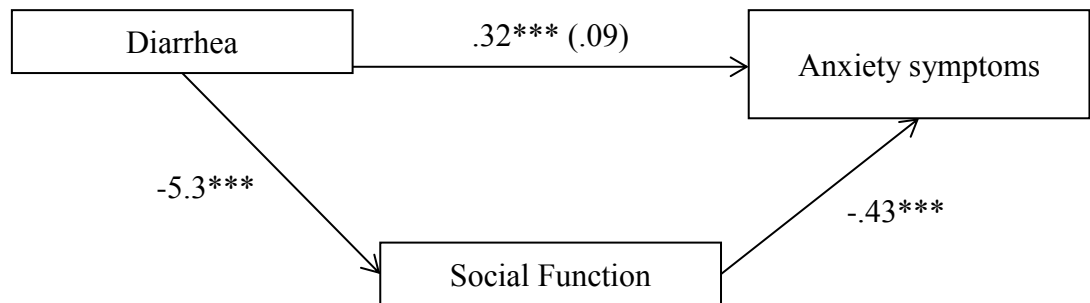

† p < .10; \* p < .05; \*\* p < .01, \*\*\* p < .001
