# Supplementary material
Source: PubMed Central journal article supplement (PMC5748015)
Supplement: NIHMS916021-supplement-Supplemental_Table_1.pdf [file NIHMS916021-supplement-Supplemental_Table_1.pdf]

## Supplemental Materials

**Table 1.** Bivariate correlations among study variables (N=144).

|                              | 1                 | 2                 | 3     | 4                | 5     | 6      | 7     |       |
|------------------------------|-------------------|-------------------|-------|------------------|-------|--------|-------|-------|
| 1. Age                       | -                 |                   |       |                  |       |        |       |       |
| 2. Gender <sup>1</sup>       | .10               | -                 |       |                  |       |        |       |       |
| 3. Disease Type <sup>2</sup> | .13               | -.21*             | -     |                  |       |        |       |       |
| 4. Stoma Status <sup>3</sup> | .25**             | .02               | na    | -                |       |        |       |       |
| 5. Time since Treatment      | .34**             | .34**             | .01   | .15 <sup>†</sup> | -     |        |       |       |
| 6. Social Functioning        | .24**             | -.15 <sup>†</sup> | .03   | -.04             | .04   | -      |       |       |
| 7. Diarrhea                  | -.07              | .01               | -.001 | .12              | -.10  | -.52** | -     |       |
| 8. Depressive Symptoms       | -.13              | -.03              | -.02  | -.05             | -.001 | -.54** | .36** | -     |
| 9. Anxiety Symptoms          | -.14 <sup>†</sup> | -.08              | .02   | .11              | .06   | -.47** | .29** | .65** |

<sup>1</sup>Dichotomized with female as the reference (0=female; 1=male)

<sup>2</sup>Dichotomized variable with rectal cancer as the reference (0=rectal cancer; 1=anal cancer)

<sup>3</sup>Dichotomized variable with no stoma as the reference (0=no stoma; 1=permanent stoma)

<sup>†</sup>p < .10; \* p < .05; \*\* p < .01; \*\*\*p < .001
